# Supplementary material for: Metronomic chemotherapy for paediatric extracranial solid tumours: a systematic review and meta-analysis of randomised clinical trials
Source: HighWire-hosted journal article supplement (doi:10.1136/bmjopen-2024-084477), 2024-10-01
Supplement: bmjopen-2024-084477supp002_data_supplement.pdf [file bmjopen-2024-084477supp002_data_supplement.pdf]

Supplemental Figures

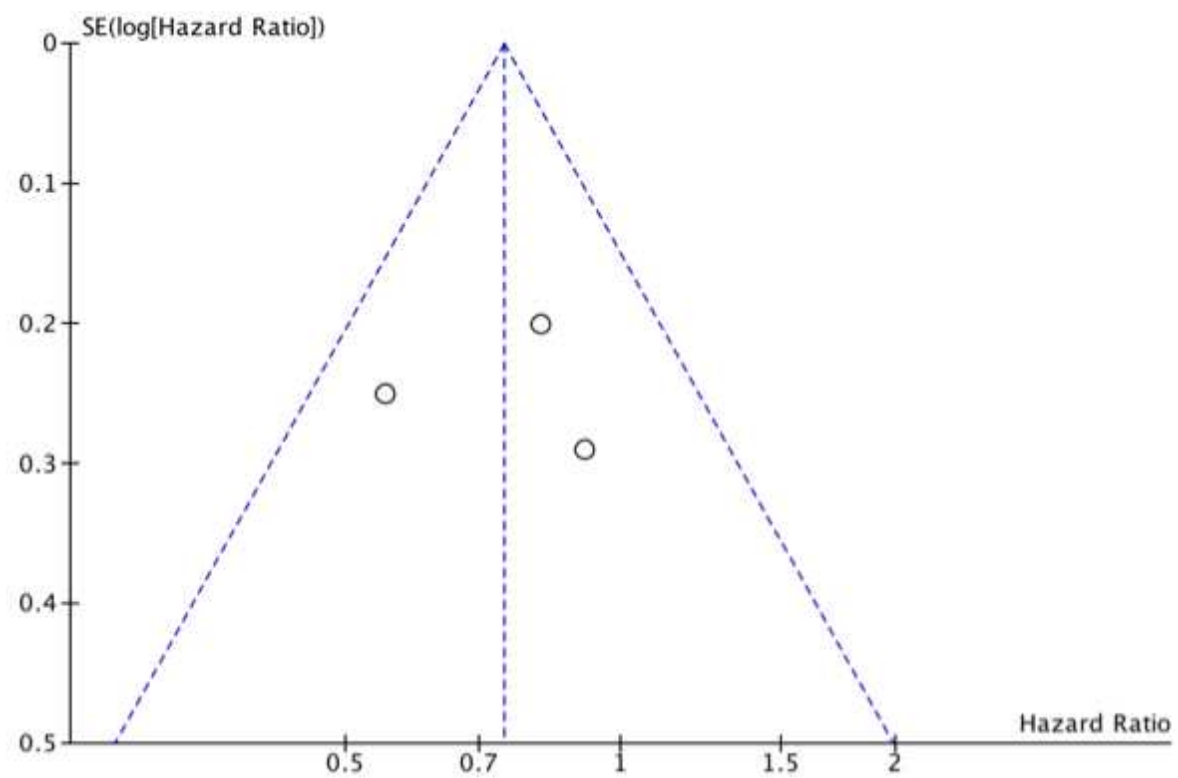

**Supplemental Figure S1** Funnel plot Metronomic chemotherapy versus Placebo or Stop treatment, outcome Overall Survival, related to Fig. 1.

Caption. SE: standard error of log[Hazard Ratio]

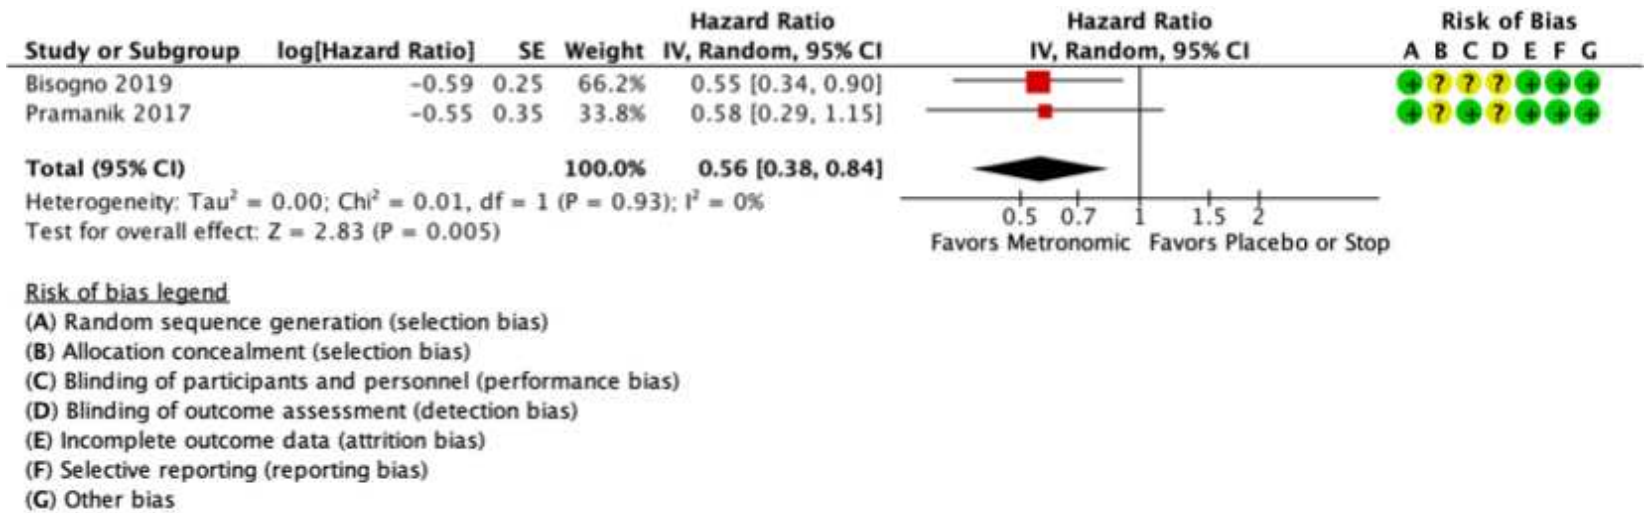

**Supplemental Figure S2** Forest plot Metronomic chemotherapy versus Placebo or Stop treatment, outcome Overall Survival not bone tumors

Caption. 95% CI: 95% confidence interval; I<sup>2</sup>: index of heterogeneity (the smaller the value the lesser the heterogeneity); IV: inverse variance (statistical method); P: probability; Random: random effects (analysis model); SE: standard error of log[Hazard Ratio]
